# Supplementary material for: LGR5 is a Conserved Marker of Hair Follicle Stem Cells Across Species and is Present Early and Throughout Follicle Morphogenesis
Source: Research Square preprint supplement (doi:10.21203/rs.3.rs-1286799/v1), 2022-02-02
Supplement: Supplementary file 1 [file 27dd33413f086e20b6da6274.pdf]

| Gene  | F (5'-3')                  | R (5'-3')                  |
|-------|----------------------------|----------------------------|
| ACTB  | ACTGCCGCATCCTCTTCCTC       | CTCCTGCTTGCTGATCCACATC     |
| GAPDH | ATCCTGGGCTACACTGAGGAC      | AAGTGGTCGTTGAGGGCAATG      |
| LGR4  | GACCGTCGGGTAGATTGCTC       | CCAGCCAATCGTAGCTCCTC       |
| LGR5  | CCTTGGCCCTGAACAAAATA       | ATTTCTTTCCAGGGAGTGG        |
| LGR6  | CAGGAGGACGGCTTCATGC        | GAGCTCCGTGAGGTTGTTCA       |
| CD34  | GGTATCTGCCTGGAGCGAAA       | GGGTCTTCGCCCAGCCTTT        |
| SOX9  | CGGTTTCGAGCAAGAATAAGC      | GTAATCCGGGTGGTCCTTCT       |
| KRT5  | CGACAACGTCAAGAAGCAGT       | GAGAGGGTGTTTGTGACGAC       |
| KRT15 | GCGAGATGGAGTGCCAGAAC       | TCCACTGACTCCTCGACGTT       |
| KRT14 | GGAGGTGAAGATCCGCGAC        | TCTGCAGCACGACATTAGCG       |
| CD200 | TGTTCCAAGTTACTAATCAGGCTGAA | AGCCCATTAGCAACATGATACTCTTT |
| SHH   | CAGTTTATCCCAACGTGGC        | CCACTGGTTCATCACGGAGA       |
| TCF4  | TGCCTTAGGGACGGACAAAG       | ATAGTTCCTGGACGGGCTTG       |
| WNT3A | GCGACTTCCTCAAGGACAAG       | GGTCACGTGTACCGAAGGAT       |
| LRIG1 | GACGCGGAGCCTAAACCTAA       | CTCCACGCTGCGAATCCTAT       |
| HOPX  | GGAGGAGACCCAGAAATGGTT      | TCTTGGTGAAGGAAGCAGC        |
| KI67  | GGACCAGGCACAATGGATGG       | CAGCTTTTGTCTGAAGCGTCC      |

**Table S1.** Genes and primer sequences used in RT-qPCR analyses

Supplementary figures

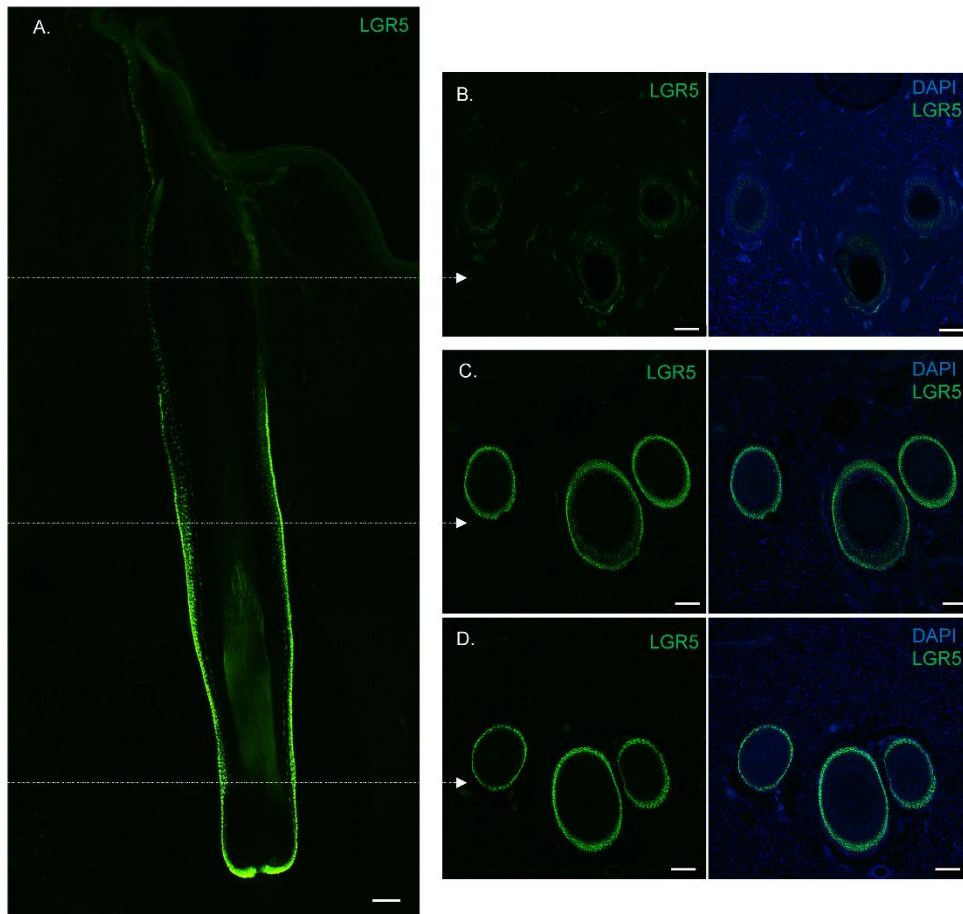

**Supplementary Figure 1.** Cross section of porcine hair follicle shows that LGR5 is expressed at a high level in the outer root sheath, and low level in the inner root sheath. H-J) Cross sections of hair follicles show distribution of GFP in correspondence with dashed white line. Scale bar represents 200  $\mu\text{M}$  (A-C) or 100  $\mu\text{M}$  (D-J).

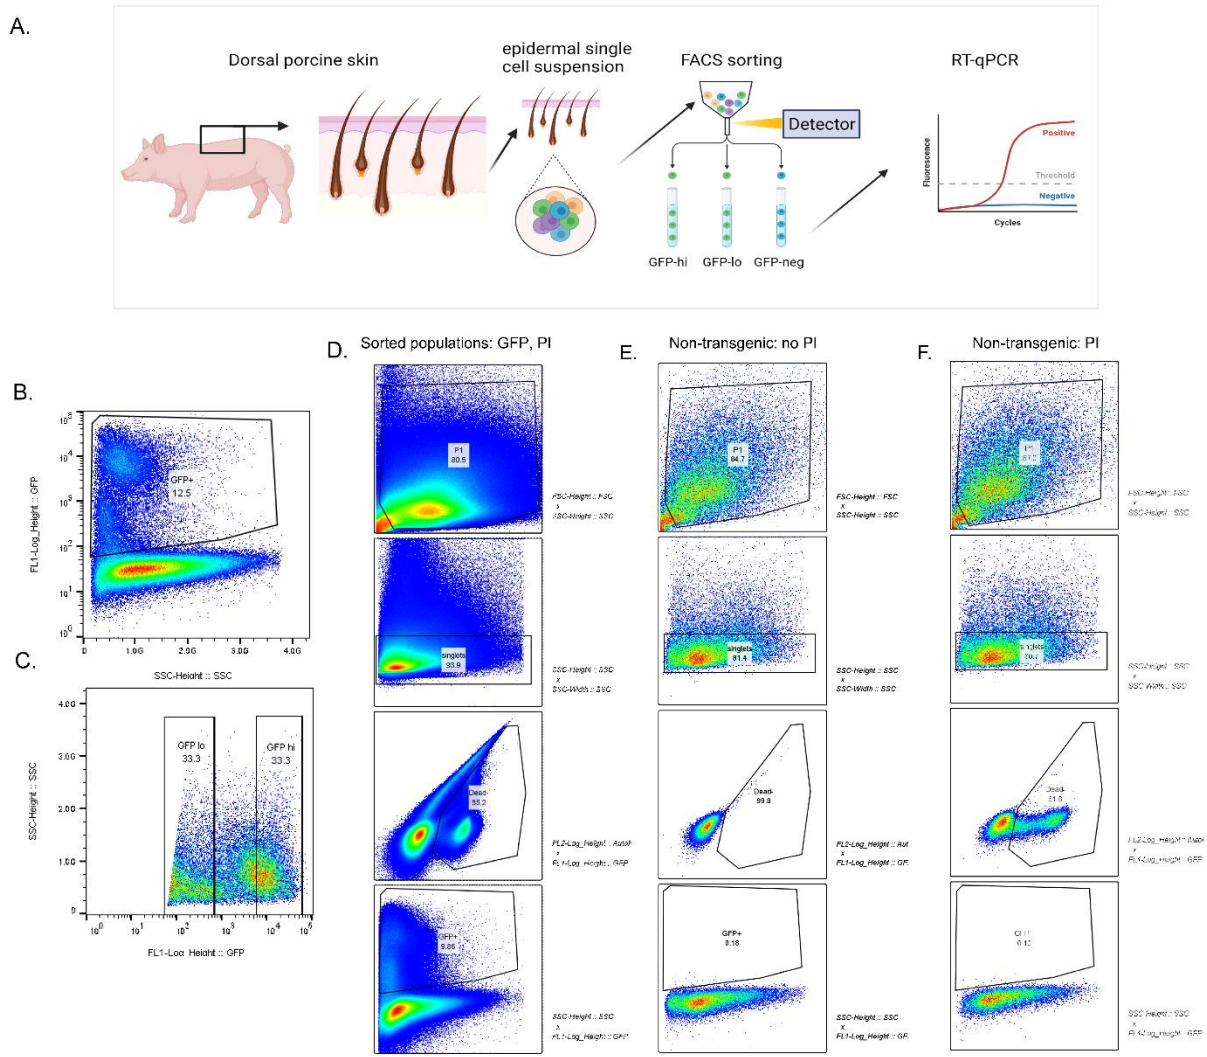

**Supplementary Figure 2. Representative flow cytometry gating strategy and controls.** A) Schematic depicting process of cell isolation and fluorescence activated cell sorting (FACS), created with BioRender. GFP+ cells were split into GFP-high or GFP-low (B-C). Gating strategies determined as follows: D) Transgenic LGR5-H2B-GFP porcine epidermis stained with propidium iodide (PI) for live-dead, E) non-transgenic porcine epidermis with no PI, F) non-transgenic porcine epidermis with PI.

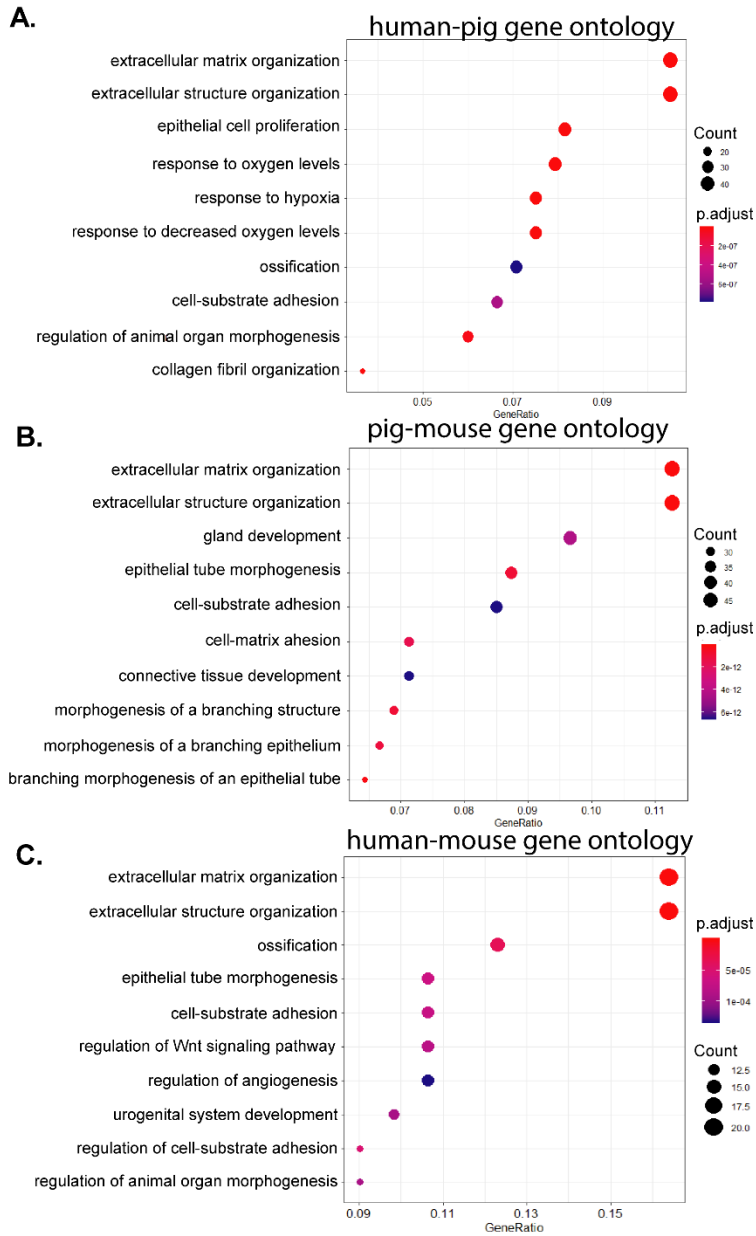

**Supplementary Figure 3.** Related to figure 4. Shared upregulated gene ontology pathways of upregulated genes in LGR5-high cells, compared pairwise across human, mouse and pig datasets.

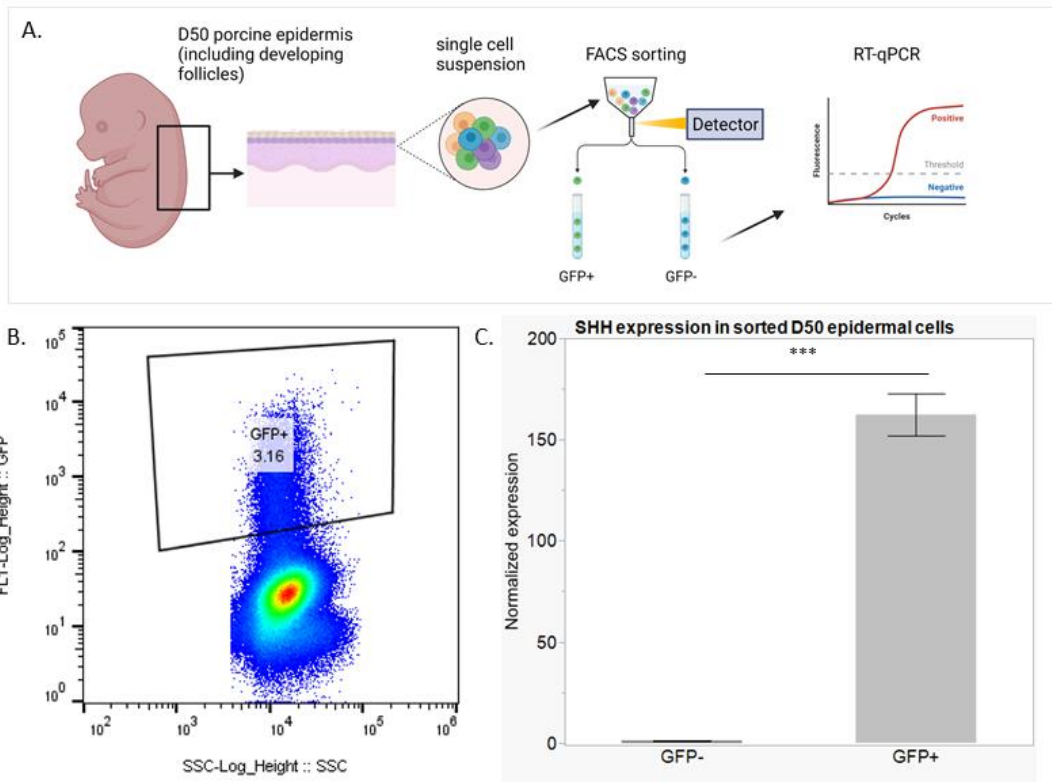

**Supplementary Figure 4: SHH expression in porcine LGR5+ D50 epidermis.** A) Schematic depicting cell isolation, sorting, and RT-qPCR analysis processes, created with BioRender. B) Representative fluorescence activated cell sorting plot representing GFP+ population from D80 fetus. C) RT-qPCR relative expression of SHH of LGR5-GFP+ vs LGR5-GFP- sorted cells. Samples were normalized using a ddCT analysis to GAPDH and ACTB and then to the GFP- sample. Student's t-test \*\*\* indicates P=0.02, n=2 pigs.
